# Supplementary material for: Gastrokine 1 induces senescence and apoptosis through regulating telomere length in gastric cancer
Source: PubMed Central journal article supplement (PMC4294346; doi:10.18632/oncotarget.2586), 2014-12-10
Supplement: oncotarget-05-11695-s001.pdf [file oncotarget-05-11695-s001.pdf]

## SUPPLEMENTARY MATERIALS, TABLES AND FIGURE

### Cell culture and transfection of GKN1, c-myc and TRF1

AGS and MKN1 gastric cancer cells were obtained from the Korean Cell Line Bank (KCLB, Seoul, Korea). These cell lines were cultured at 37°C in 5% CO<sub>2</sub> in RPMI-1640 medium (Lonza, Basel, Switzerland) with 10% heat-inactivated fetal bovine serum. Cells were authenticated by short tandem repeat profiling by KCLB, and were used within 12 months after receipt or resuscitation. For transient transfection, *GKN1*, *c-myc*, and *TRF1* cDNAs were cloned into the pcDNA3.1 expression vector (Invitrogen, Carlsbad, CA, USA). AGS and MKN1 cells were transiently transfected in 60 mm-diameter dishes with the expression plasmids (2 µg total DNA) using Lipofectamine Plus transfection reagent (Invitrogen) according to the manufacturer's recommendations. Transfection rate was monitored by fluorescence microscopy, and the transfection efficiency of more than 80% was achieved.

### Generation of stable cell lines expressing GKN1

To isolate stable cell lines expressing GKN1, AGS and MKN1 cells were seeded into 100-mm dishes. When the cells reached 80% confluence, the human GKN1-expressing vector was transfected into AGS and MKN1 cells using Lipofectamine 2000 (Invitrogen). After 24 h, the medium was changed, and G418 (Wako, Osaka, Japan) was added to the culture medium at a final concentration

of 1 mg/mL. Thereafter, the cells were cultured in the presence of G418 for 4 weeks. Medium was exchanged every 2 days. Some cells were isolated from the colonies formed in the culture and were seeded into other dishes to establish a stable cell line expressing GKN1. The expression of GKN1 in each cell line was determined by immunoblot analysis.

### Measurement of senescence and apoptosis

For senescence analysis, all the experiments were performed in cells from passage 5. The cells ( $2 \times 10^6$ ) were cultured in a 10-cm dish and incubated for 4 days in RPMI-1640 medium with 10% FBS. When the cells reached approximately 80% confluence, serial passage was performed by trypsinization. Stable AGS<sup>Mock</sup>, MKN1<sup>Mock</sup>, AGS<sup>GKN1</sup>, and MKN1<sup>GKN1</sup> cells were fixed and incubated with freshly prepared senescence-associated β-galactosidase staining solution at 37°C overnight. The number of blue-stained cells was counted in at least 10 fields at 20X magnification and expressed as the percentage of the senescent cells.

For apoptosis analysis, cells ( $2 \times 10^6$ ) from passage 5 were cultured in a 10-cm dish and incubated for 4 days in RPMI-1640 medium with 10% FBS. For annexin V staining, AGS<sup>Mock</sup>, MKN1<sup>Mock</sup>, AGS<sup>GKN1</sup>, and MKN1<sup>GKN1</sup> cells were washed twice with 1 X binding buffer and incubated with freshly prepared 1 X binding buffer, which included annexin V, fluorescein isothiocyanate (FITC) and 4',6-diamidino-2-phenylindole (DAPI) at room temperature for at least 30 min in the dark. After staining, the observation was done under a fluorescence microscope (Carl Zeiss Co., Ltd., Germany)



**Supplementary Table S2. Antibody list for western blot analysis**

| Gene name                          | Company        |
|------------------------------------|----------------|
| <i>GKN1</i>                        | Sigma          |
| <i>c-Myc</i>                       | Cell signaling |
| <i>TRF1</i>                        | Santa cruz     |
| <i>hTERT</i>                       | Abcam          |
| <i>p27</i>                         | Cell signaling |
| <i>p53</i>                         | Cell signaling |
| <i>p21</i>                         | Cell signaling |
| <i>p16</i>                         | Santa cruz     |
| <i>p-ATM</i>                       | Cell signaling |
| <i>p-ATR</i>                       | Cell signaling |
| <i>Skp2</i>                        | Santa cruz     |
| <i>Caspase 3</i>                   | Cell signaling |
| <i>GAPDH</i>                       | Santa cruz     |
| <i><math>\alpha</math>-tubulin</i> | Santa cruz     |
| <i>Histone H4</i>                  | Cell signaling |

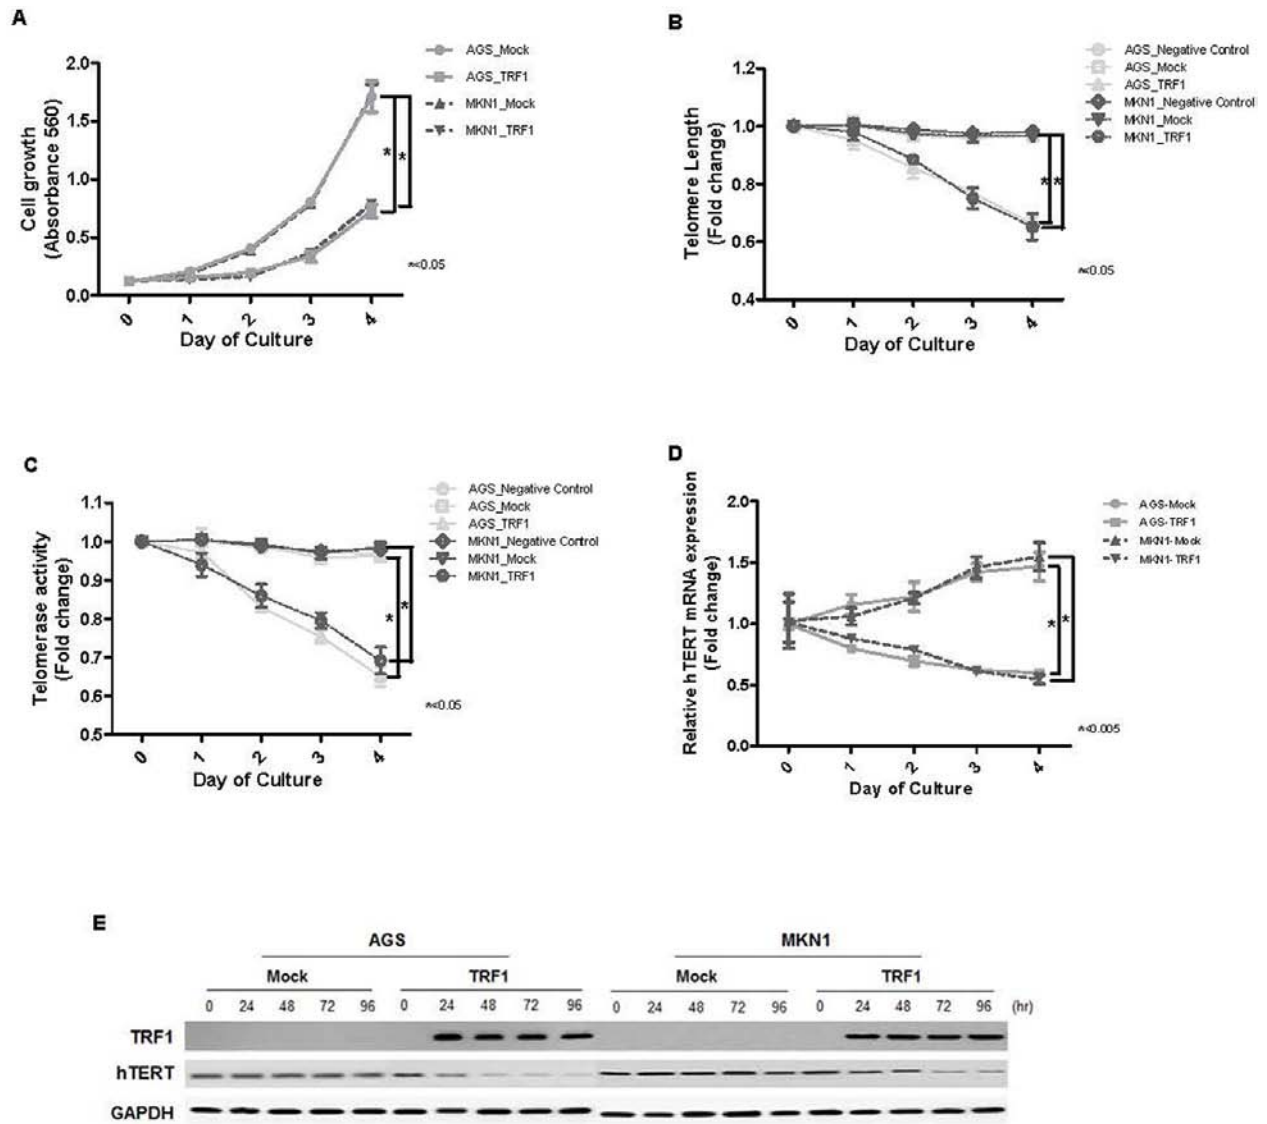

**Supplementary Figure S1: TRF1 inhibits cell viability and decreases telomere length and telomerase activity (A)** In MTT assay, ectopic expression of TRF1 significantly inhibited cell viability of AGS and MKN1 cells. **(B, C & D)** There was a steady decline in the telomere length (B), telomerase activity (C), and *hTERT* mRNA transcript (D) in AGS and MKN1 cells transfected with *TRF1*, compared with those in non-transfected negative control and mock-transfected cells. **(E)** Ectopic expression of TRF1 markedly reduced the hTERT protein expression in both cells.
